# Supplementary material
Source: ML conference proceedings conference paper supplement (https://proceedings.mlr.press/v28/zhang13a.html)
Supplement: Supplementary file 1 [file zhang13a-supp.pdf]

---

# MILEAGE: Multiple Instance LEarning with Global Embedding

## – Supplemental Materials

---

Dan Zhang<sup>1</sup>

Jingrui He<sup>2</sup>

Luo Si<sup>3</sup>

Richard D. Lawrence<sup>4</sup>

DANZHANG2008@GMAIL.COM

JINGRUI.HE@GMAIL.COM

LSI@CS.PURDUE.EDU

RICKLAWR@US.IBM.COM

<sup>1</sup>Facebook Incorporation, Menlo Park, CA 94025

<sup>2</sup>Computer Science Department, Stevens Institute of Technology, Hoboken, NJ 07030

<sup>3</sup>Computer Science Department, Purdue University, West Lafayette, IN 47907

<sup>4</sup>IBM T.J. Watson Research Center, Yorktown Heights, NY 10562

**Proof of Theorem 1:** It is clear that  $P(\mathbf{w}^{(t)}, \gamma^{(t)}) \leq \gamma^{(t)}\Omega(\mathbf{w}^{(t-1)})$ , since  $(\mathbf{w} = \mathbf{w}^{(t-1)}, \zeta = 0)$  is a feasible solution for problem (10). So,

$$\gamma^{(t)}\zeta^{(t)} + \frac{1}{2}\|\mathbf{w}^{(t)} - \mathbf{w}^{(t-1)}\|^2 \leq \gamma^{(t)}(\Omega(\mathbf{w}^{(t-1)}) - \Omega(\mathbf{w}^{(t)})). \quad (1)$$

The LHS is lower bounded by  $\gamma^{(t)}\mathbf{g}(\mathbf{w}^{(t-1)})^T(\mathbf{w}^{(t)} - \mathbf{w}^{(t-1)}) + \frac{1}{2}\|\mathbf{w}^{(t)} - \mathbf{w}^{(t-1)}\|^2$ <sup>1</sup>. Then, we would have  $P(\mathbf{w}^{(t)}, \gamma^{(t)}) \geq \gamma^{(t)}g(\mathbf{w}^{(t-1)})^T(\mathbf{w}^{(t)} - \mathbf{w}^{(t-1)}) + \frac{1}{2}\|\mathbf{w}^{(t)} - \mathbf{w}^{(t-1)}\|^2 \geq -\frac{\gamma^{(t)2}}{2}\|g(\mathbf{w}^{(t-1)})\|^2$ . So,  $-\frac{\gamma_0^2}{2}R^2 \leq -\frac{\gamma^{(t)2}}{2}\|g(\mathbf{w}^{(t-1)})\|^2 \leq P(\mathbf{w}^{(t)}, \gamma^{(t)}) \leq \gamma_0 \max_t \Omega(\mathbf{w}^{(t)}) = \gamma_0 D$ . It is clear that in problem (5),  $R = C \max\{\max_{i,j} \|\mathbf{B}_{ij}\|, \max_i \|\mathbf{B}_i\|\}$ .  $\square$

**Proof of Theorem 2:** The algorithm terminates under two conditions. We show under either of the two conditions, the algorithm terminates after finite steps.

1) Condition 1: As shown in step (8) of Table 1, if  $\gamma^{(t)}$  is below a specific threshold  $\epsilon_1$ , the algorithm terminates. It is clear that the method cannot execute the step (7) to step (9) more than  $\log \frac{\epsilon_1}{\gamma_0} / \log(\eta)$  times.

2) Condition 2: Suppose the conditions stated in step (4) hold. By rearranging Eq.(1), we can get:  $\zeta^{(t)} + \Omega(\mathbf{w}^{(t)}) - \Omega(\mathbf{w}^{(t-1)}) \leq -\frac{1}{2\gamma^{(t)}}\|\mathbf{w}^{(t)} - \mathbf{w}^{(t-1)}\|^2$ . So,  $|\zeta^{(t)} + \Omega(\mathbf{w}^{(t)}) - \Omega(\mathbf{w}^{(t-1)})| \geq \frac{1}{2\gamma^{(t)}}\|\mathbf{w}^{(t)} - \mathbf{w}^{(t-1)}\|^2 \geq \frac{1}{2\gamma_0}\theta^2$ . It means that, each execution of step (4) to step (6) will decrease  $F(\mathbf{w})$  by at least  $\frac{m}{2\gamma_0}\theta^2$ . Since  $F(\mathbf{w})$  is upper bounded by  $E$  and lower bounded by 0. Step (4) to step (6) cannot be executed for at most  $\frac{2E\gamma_0}{m\theta^2}$  steps.

By summarizing these two conditions, we can conclude that the total number iterations should not exceed  $\log \frac{\epsilon_1}{\gamma_0} / \log(\eta) + \frac{2E\gamma_0}{m\theta^2}$ .

---

<sup>1</sup>Here, to avoid confusion,  $\mathbf{g}(\mathbf{w}^{(t-1)}) = \mathbf{g}_{t-1}$ .

The problem (5) is upper bounded by  $nC$ , since  $(\mathbf{w} = 0, \xi_i = 1), i = 1, \dots, n$  is a feasible solution. So, the maximum number of required iterations is  $\log \frac{\epsilon_1}{\gamma_0} / \log(\eta) + \frac{2nC\gamma_0}{m\theta^2}$ .  $\square$

**Proof of Theorem 3:** The Rademacher Complexity of  $\mathcal{F}_B$  can be calculated as:

$$\begin{aligned} \hat{R}_n(\mathcal{F}_B) &= E_\sigma[\sup_{f \in \mathcal{F}_B} |\frac{2}{n} \sum_{i=1}^n \sigma_i f(\mathbf{B}_i, \mathbf{B}_{i^*})|] \\ &= E_\sigma[\sup_{\mathbf{w} \|\leq B} |\frac{2}{n} \sum_{i=1}^n \sigma_i (\lambda_i \max_{j \in \mathbf{B}_i} \mathbf{w}^T \mathbf{B}_{ij} + (1 - \lambda_i) \mathbf{w}^T \mathbf{B}_i)|] \\ &\leq \frac{2}{n} E_\sigma[\sum_{i=1}^n \sigma_i \lambda_i \max_{j \in \mathbf{B}_i} \mathbf{w}_1^{*T} \mathbf{B}_{ij}] + \frac{2}{n} E_\sigma[\sum_{i=1}^n \sigma_i (1 - \lambda_i) \mathbf{w}_2^{*T} \mathbf{B}_i] \\ &\leq \frac{2B}{n} E_\sigma[\sum_{i=1}^n \sigma_i \lambda_i \|\mathbf{B}_{ij^*}\|] + \frac{2B}{n} E_\sigma[\sum_{i=1}^n \sigma_i (1 - \lambda_i) \|\mathbf{B}_i\|] \\ &\leq \frac{2B}{n} \sqrt{\sum_{i=1}^n \lambda_i^2 K(\mathbf{B}_{ij^*}, \mathbf{B}_{ij^*})} + \frac{2B}{n} \sqrt{\sum_{i=1}^n (1 - \lambda_i)^2 K(\mathbf{B}_i, \mathbf{B}_i)} \\ &\leq \frac{2B}{n} (\max_{\varphi_{ij} \geq 0, \varphi_i^T \mathbf{1} = 1} \sqrt{\sum_{i=1}^n \sum_{j=1}^{n_i} \lambda_i^2 \varphi_{ij}^2 K(\mathbf{B}_{ij}, \mathbf{B}_{ij})} + \sqrt{\sum_{i=1}^n (1 - \lambda_i)^2 K(\mathbf{B}_i, \mathbf{B}_i)}), \end{aligned}$$

where  $j_i^* = \arg \max_j \mathbf{w}^T \mathbf{B}_{ij}$ ,  $\mathbf{w}_1^* = \arg \max_{\mathbf{w}} |\sum_{i=1}^n \sigma_i \lambda_i \max_{j \in \mathbf{B}_i} \mathbf{w}^T \mathbf{B}_{ij}|$  and  $\mathbf{w}_2^* = \arg \max_{\mathbf{w}} |\sum_{i=1}^n (1 - \lambda_i) \max_{j \in \mathbf{B}_i} \mathbf{w}^T \mathbf{B}_{ij}|$ . It can be seen that the Rademacher Complexity is composed of two different parts. The first part is mainly derived from the multiple instance setting, while the second part is from the traditional setting.

**Proof of Theorem 5:** It is clear that

$$\begin{aligned} &\frac{2B}{n} \max_{\varphi_{ij} \geq 0, \varphi_i^T \mathbf{1} = 1} \sqrt{\sum_{i=1}^n \sum_{j=1}^{n_i} \lambda_i^2 \varphi_{ij}^2 K(\mathbf{B}_{ij}, \mathbf{B}_{ij})} \\ &+ \frac{2B}{n} \sqrt{\sum_{i=1}^n (1 - \lambda_i)^2 K(\mathbf{B}_i, \mathbf{B}_i)} \\ &\leq \max\{\frac{C_2}{C_1} a, 1 - \frac{C_2}{C_1} (1 - a)\} C_1 + (1 - a) C_2 \end{aligned}$$

If  $C_1 < C_2$ ,  $\max\{\frac{C_2}{C_1}a, 1 - \frac{C_2}{C_1}(1 - a)\} = \frac{C_2}{C_1}a$ , So,  
 $\max\{\frac{C_2}{C_1}a, 1 - \frac{C_2}{C_1}(1 - a)\}C_1 + (1 - a)C_2 = \frac{C_2}{C_1}aC_1 + (1 - a)C_2 = C_2$ .

If  $C_2 \leq C_1$ ,  $\max\{\frac{C_2}{C_1}a, 1 - \frac{C_2}{C_1}(1 - a)\} = 1 - \frac{C_2}{C_1}(1 - a)$ ,  
So,  $\max\{\frac{C_2}{C_1}a, 1 - \frac{C_2}{C_1}(1 - a)\}C_1 + (1 - a)C_2 = (1 - \frac{C_2}{C_1}(1 - a))C_1 + (1 - a)C_2 = C_1$ .

By summarizing these two conditions, we can get the conclusion.□
